# Supplementary material
Source: PubMed Central journal article supplement (PMC8940701)
Supplement: NIHMS1780097-supplement-1.pdf [file NIHMS1780097-supplement-1.pdf]

### Supplementary Table 1

| Reaction                                | Primer 1                       | Primer 2                       | Primer 3                | WT Product | Mutant Product |
|-----------------------------------------|--------------------------------|--------------------------------|-------------------------|------------|----------------|
| <i>Cre</i>                              | GCTGCCACGACCAAGTGACAG<br>CAATG | GTAGTTATTCGGATCATCAGC<br>TACAC |                         |            | 400<br>bp      |
| <i>ROSA26<sup>m</sup></i><br><i>TmG</i> | CTCTGCTGCCTCCTGGCTTCT          | CGAGGCGGATCACAAGCAATA          | TCAATGGGCGGGGGT<br>CGTT | 330<br>bp  | 250<br>bp      |

#### *Genotyping Primers*

A list of genotyping primers and product sizes. All reactions were run for 35 cycles with an annealing temperature of 60° C.
